# Supplementary material for: Spatially clustered type I interferon responses at injury borderzones
Source: PubMed Central journal article supplement (PMC11374671; doi:10.1038/s41586-024-07806-1), 2024-08-28
Supplement: 41586_2024_7806_MOESM1_ESM.pdf [file 41586_2024_7806_MOESM1_ESM.pdf]

**Supplementary information**

---

**Spatially clustered type I interferon responses at injury borderzones**

---

In the format provided by the authors and unedited

a

| Assay                                                                      | Total Cells<br>(Imaging Based) | Spatial Spot Counts | Biological Replicates (Individuals)<br>Imaging-Based/Sequencing-Based |
|----------------------------------------------------------------------------|--------------------------------|---------------------|-----------------------------------------------------------------------|
| Sham                                                                       | -                              | 3536                | - / 2                                                                 |
| WT<br>D1 MI                                                                | 2826                           | 2579                | 1 / 1                                                                 |
| WT<br>D3 MI or I/R Males                                                   | 44,606                         | 9,907               | 1 / 4                                                                 |
| WT<br>D3 MI Females                                                        | -                              | 4,363               | - / 2                                                                 |
| WT<br>D7 MI                                                                | -                              | 7,116               | - / 3                                                                 |
| <i>Ccr2</i> <sup>-/-</sup><br>D3 MI                                        | -                              | 5,056               | - / 2                                                                 |
| <i>Irf3</i> <sup>-/-</sup><br>D3 MI or I/R                                 | 41,389                         | 6,740               | 1 / 3                                                                 |
| <i>Ifnar</i> <sup>-/-</sup><br>anti-IFNAR-ab D3 MI                         | -                              | 7,733               | - / 3                                                                 |
| <i>Cgas</i> <sup>-/-</sup><br>D3 MI                                        | -                              | 2,721               | - / 1                                                                 |
| <i>STING</i> <sup>-/-</sup><br>D3 MI                                       | -                              | 2,150               | - / 1                                                                 |
| <i>Irf3</i> <sup>fl/fl</sup> : <i>Myh6</i> <sup>cre/+</sup><br>D3 MI       | -                              | 4,938               | - / 2                                                                 |
| <i>Irf3</i> <sup>fl/fl</sup> : <i>Col1a1</i> <sup>creERT2/+</sup><br>D3 MI | -                              | 4,807               | - / 2                                                                 |
| <i>Irf3</i> <sup>fl/fl</sup> : <i>Cx3cr1</i> <sup>creERT2/+</sup><br>D3 MI | -                              | 4,734               | - / 2                                                                 |
| <i>Irf3</i> <sup>fl/fl</sup> : <i>S100a8</i> <sup>cre/+</sup>              | -                              | 4,860               | - / 2                                                                 |
| <i>Irf3</i> <sup>fl/fl</sup> : <i>Tie2</i> <sup>cre/+</sup><br>D3 MI       | -                              | 4,310               | - / 2                                                                 |
| Needle Pass<br>D3 Post-injury                                              | -                              | 4,097               | - / 4                                                                 |
| Rupture                                                                    | 43,351                         | 7,490               | 1 / 6                                                                 |
| Human                                                                      | -                              | 48,550              | - / 15                                                                |
| <b>Total</b>                                                               | <b>132,171</b>                 | <b>135,687</b>      | <b>61</b>                                                             |

**Supplementary Fig. 1 Summary table of biological replicates in imaging- and sequencing-based spatial transcriptomics.**

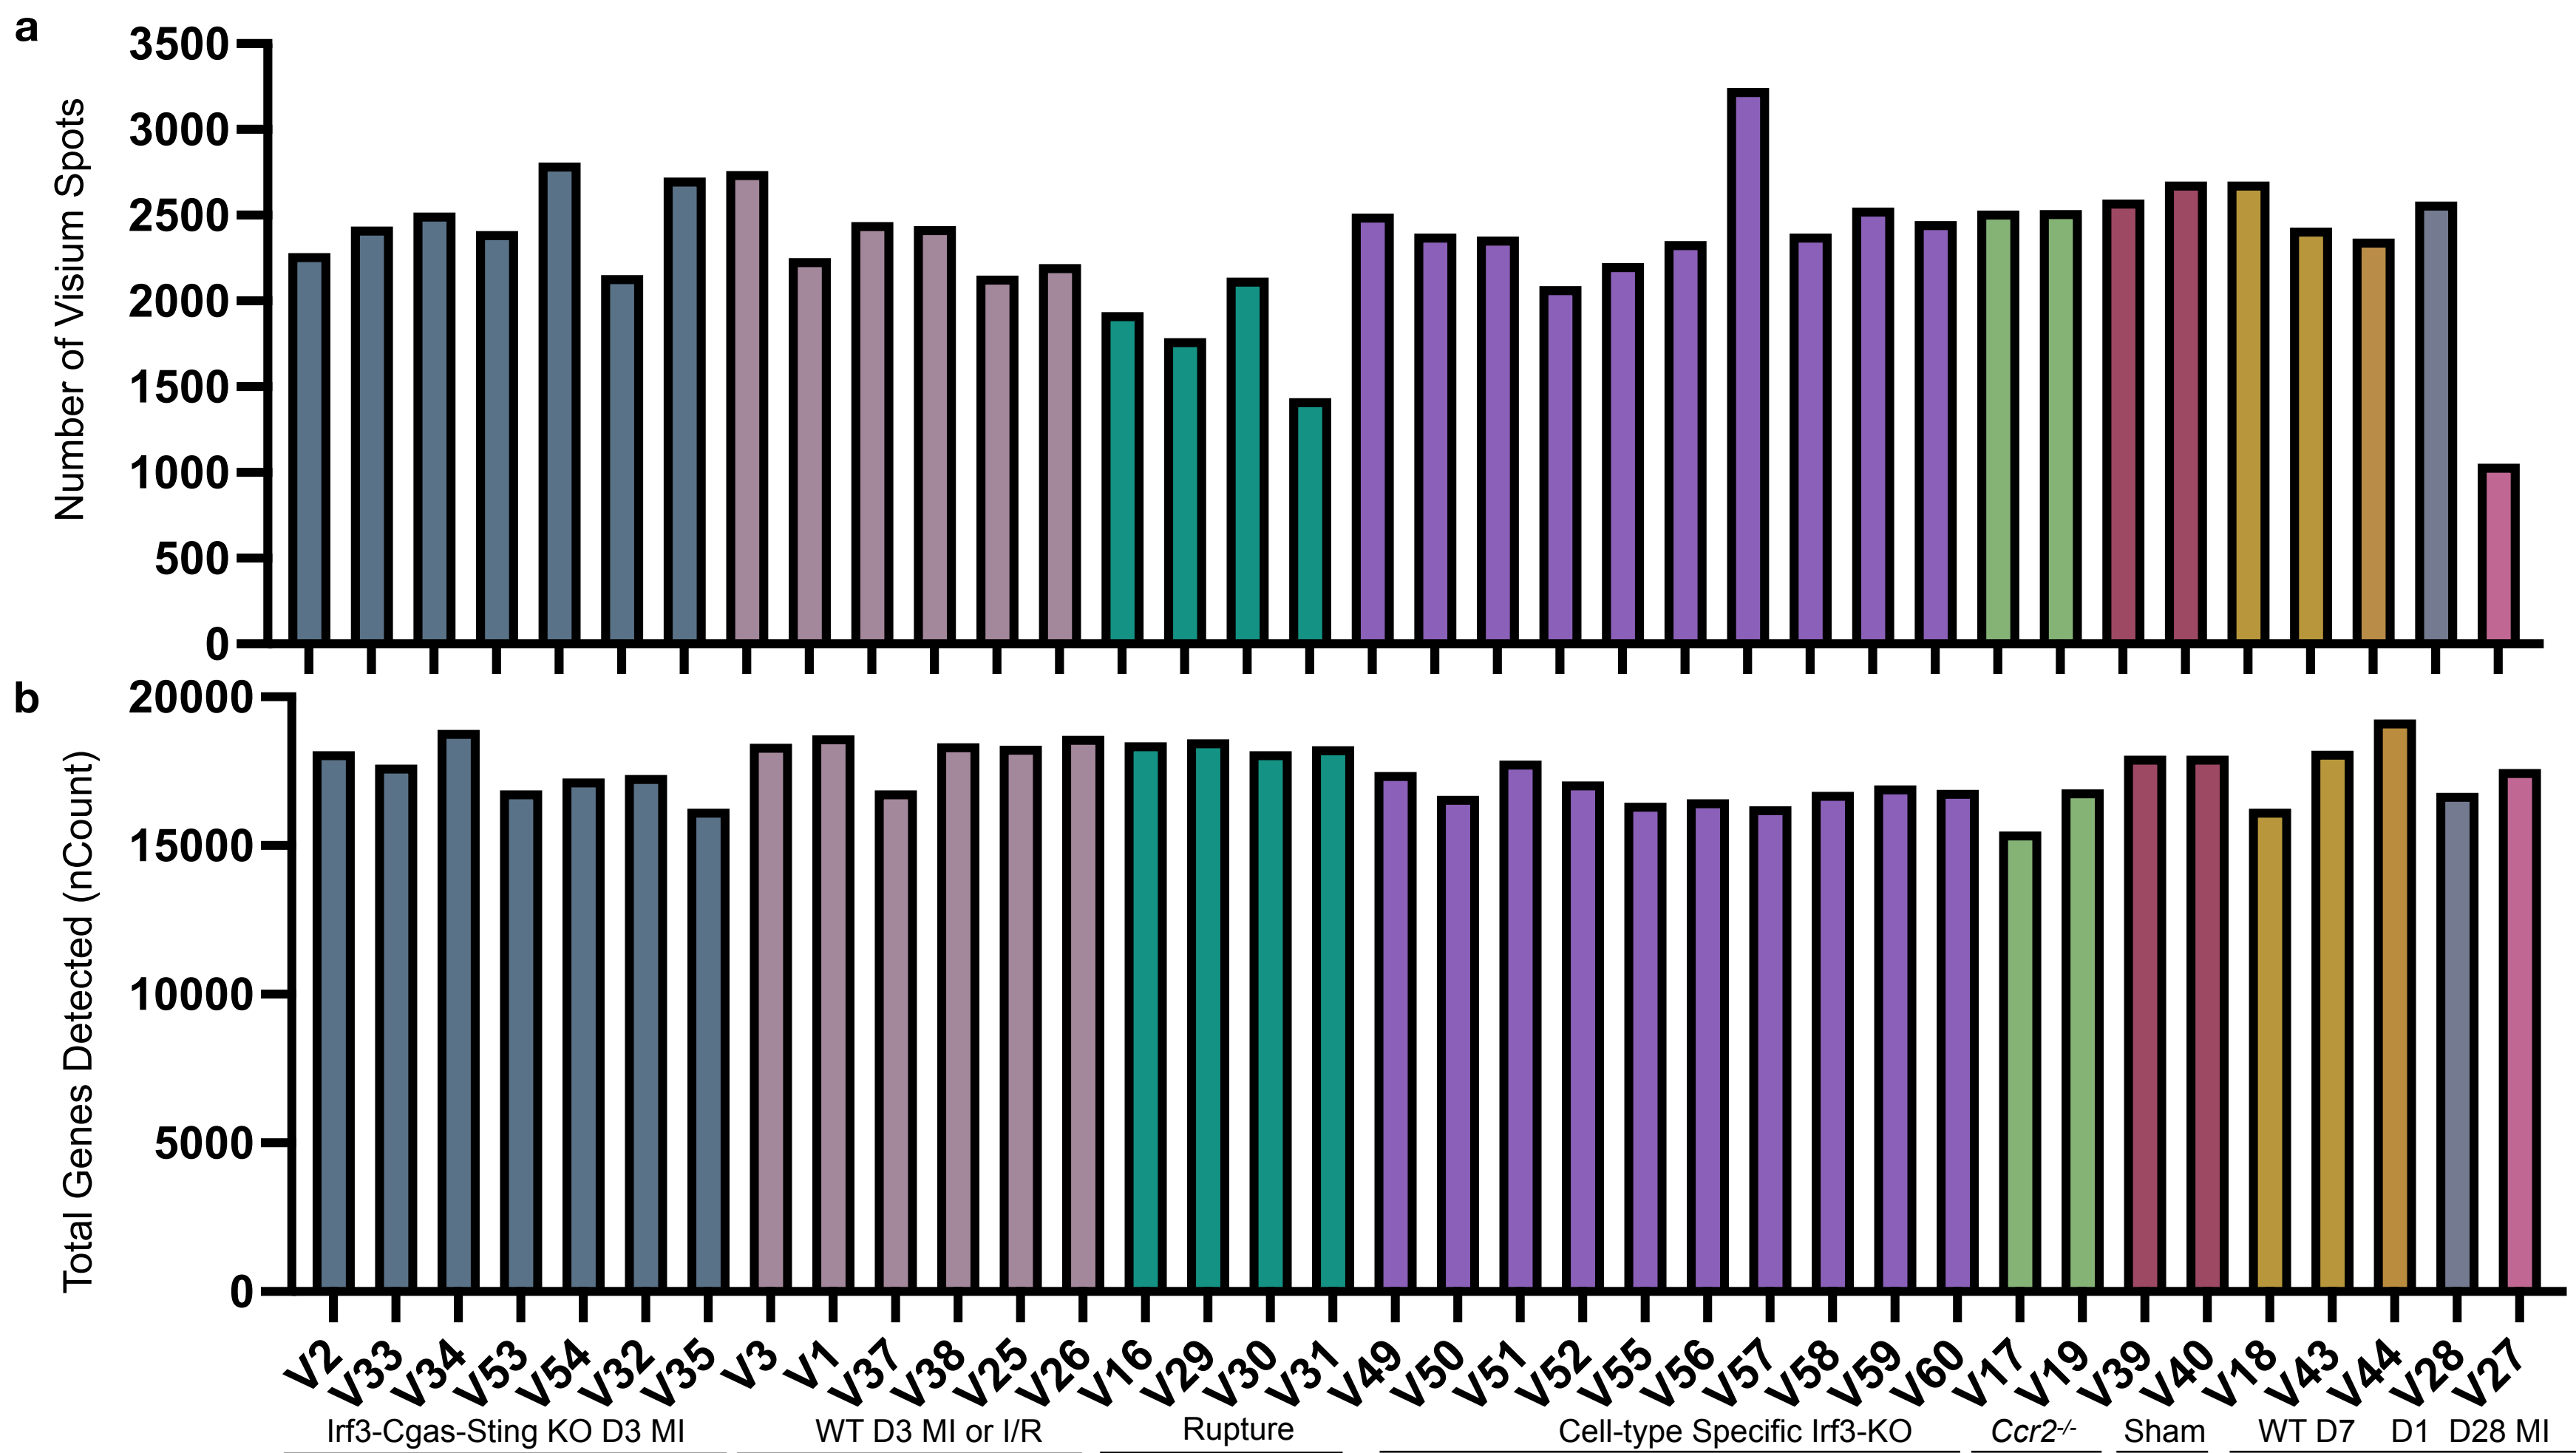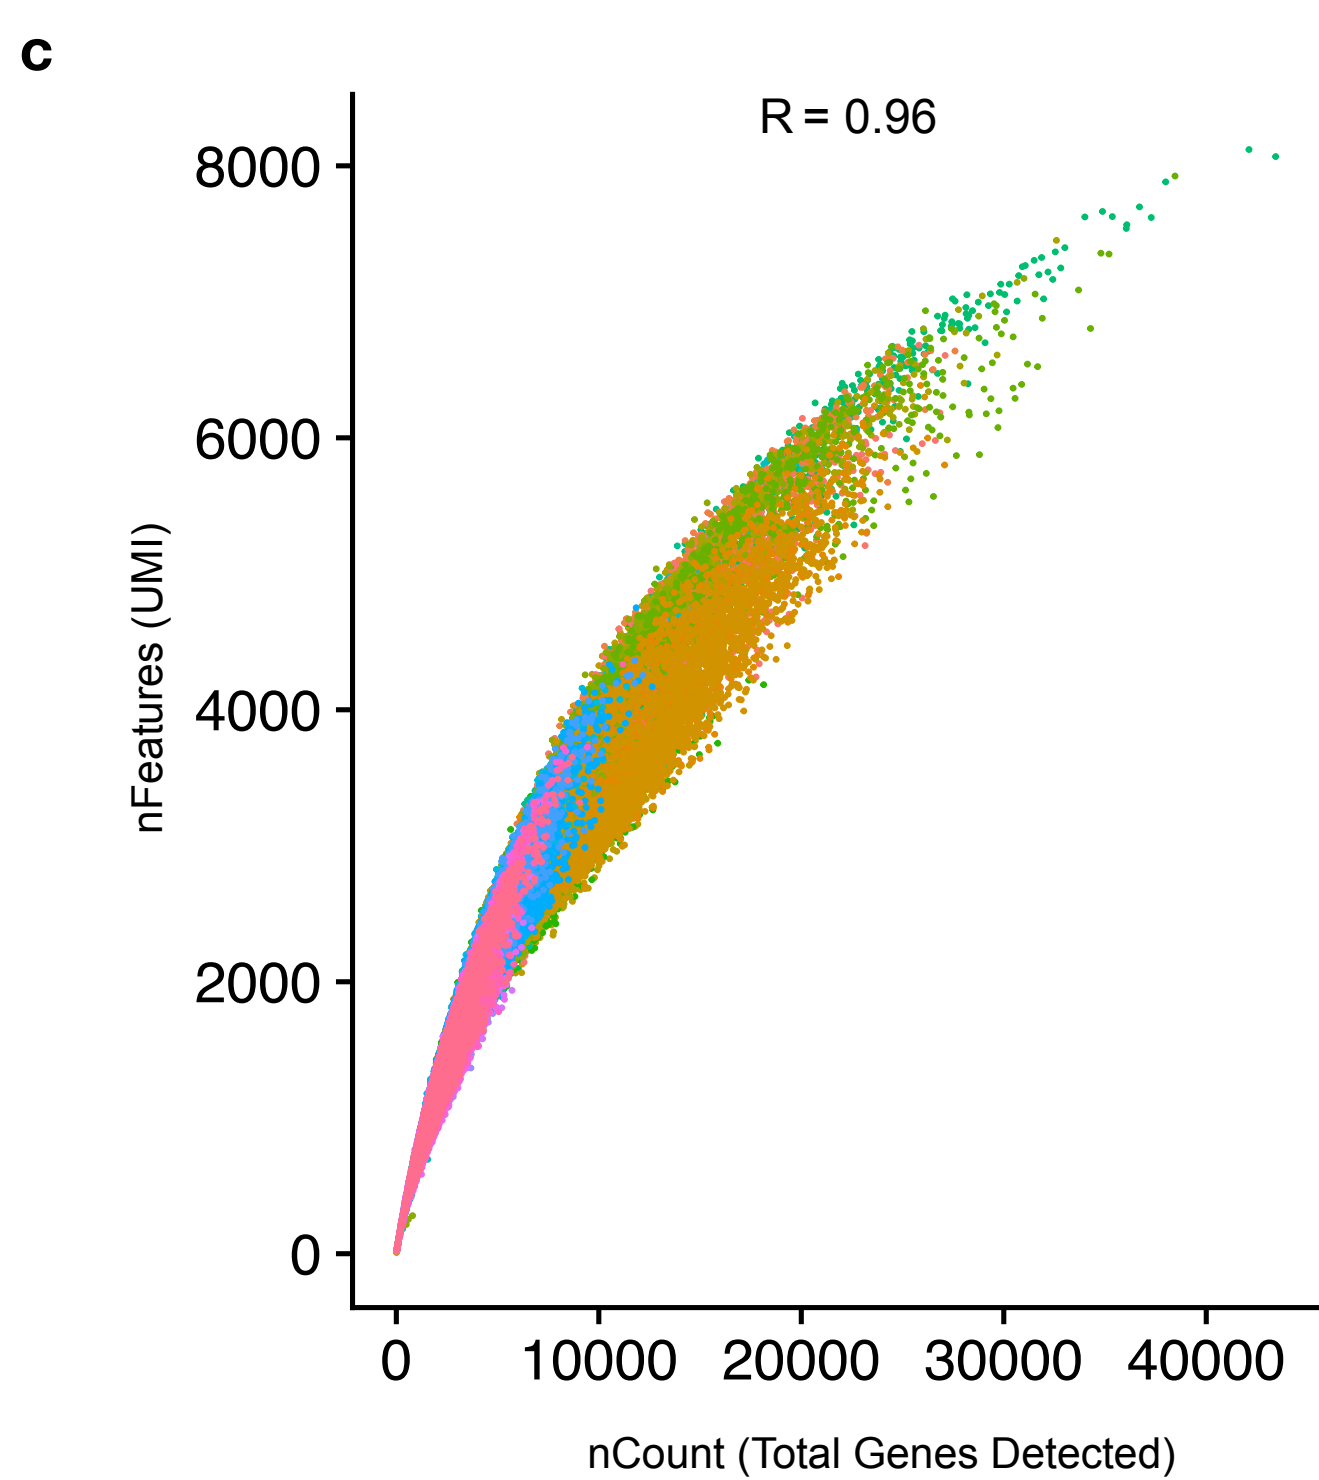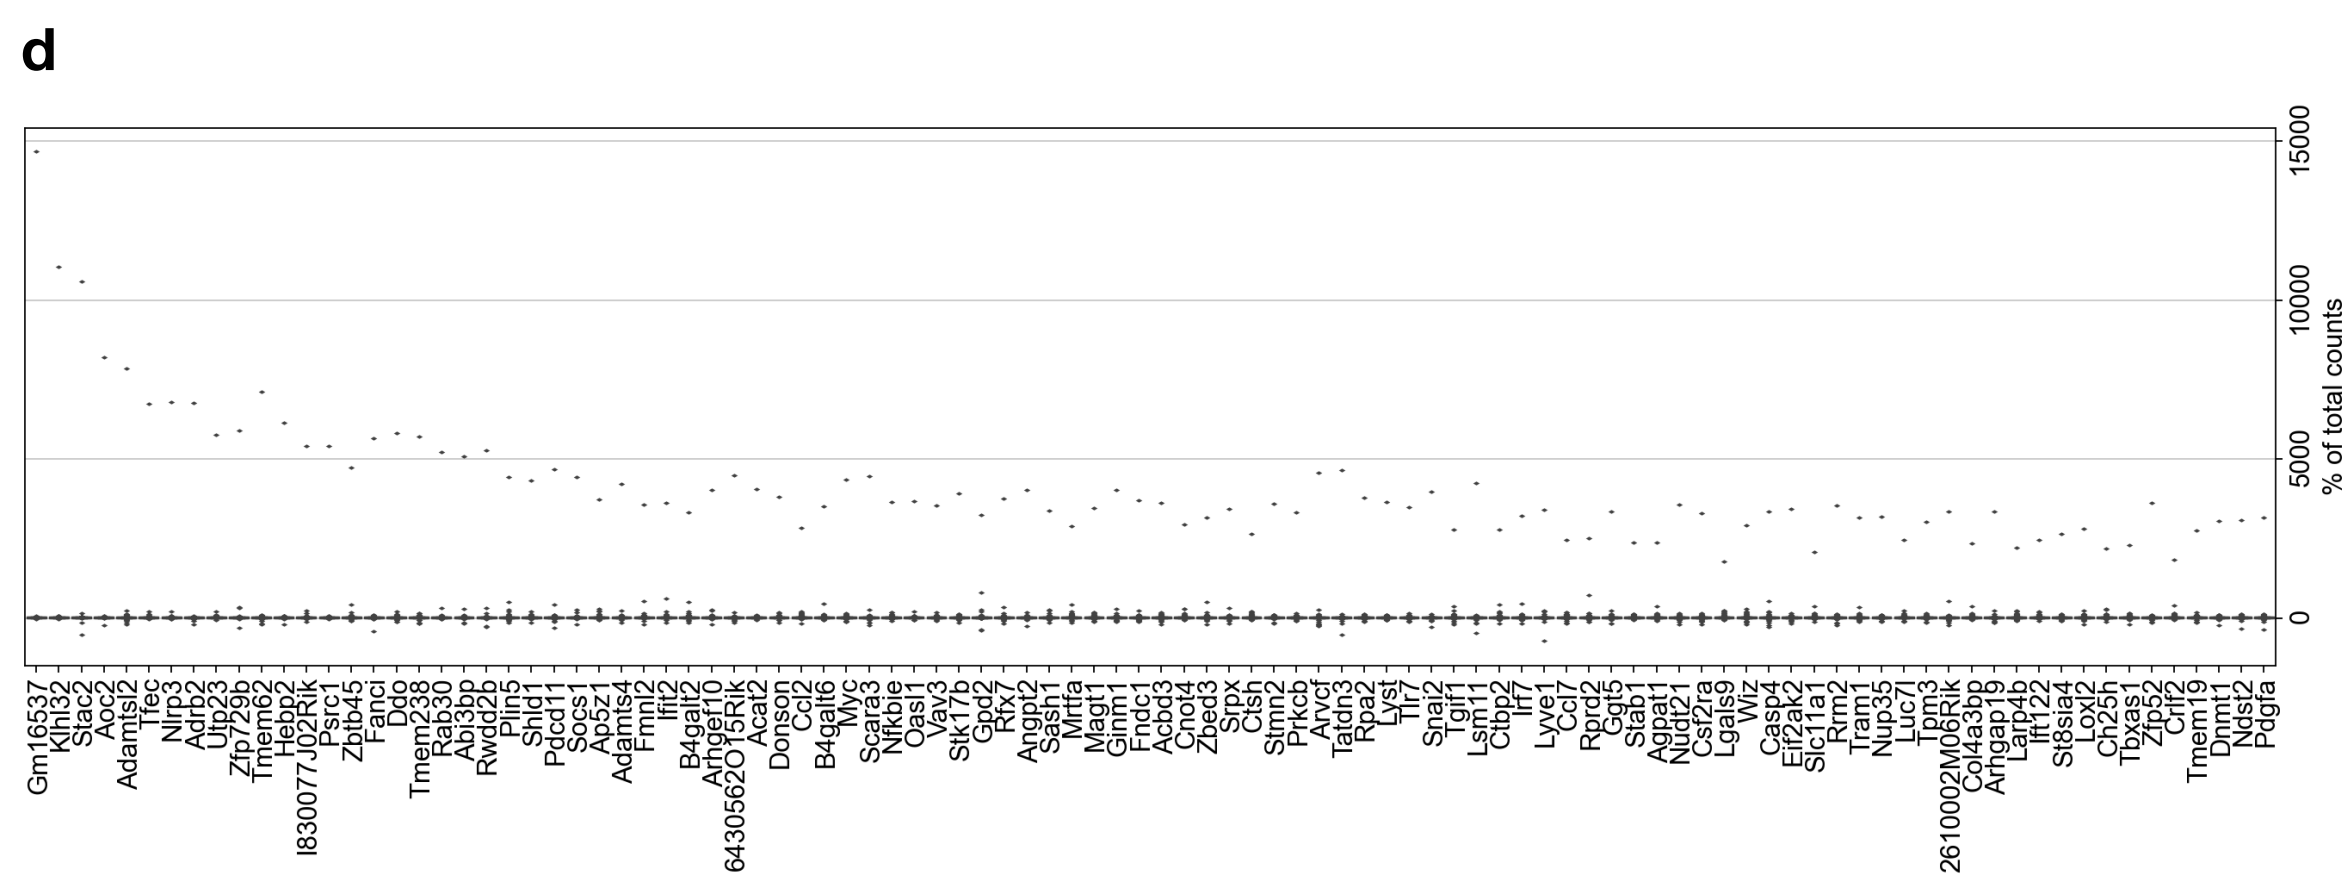

**Supplementary Fig. 2 Quality control metrics of sequencing-based spatial transcriptomic assays. (a)** Number of sequencing-based spatial transcriptomic capture spots per sample **(b)** Total genes detected per sample. **(c)** Correlation of total genes and unique genes in integrated Visium object. **(d)** Differentially expressed gene list of integrated object with mitochondrial (mt-) genes removed.



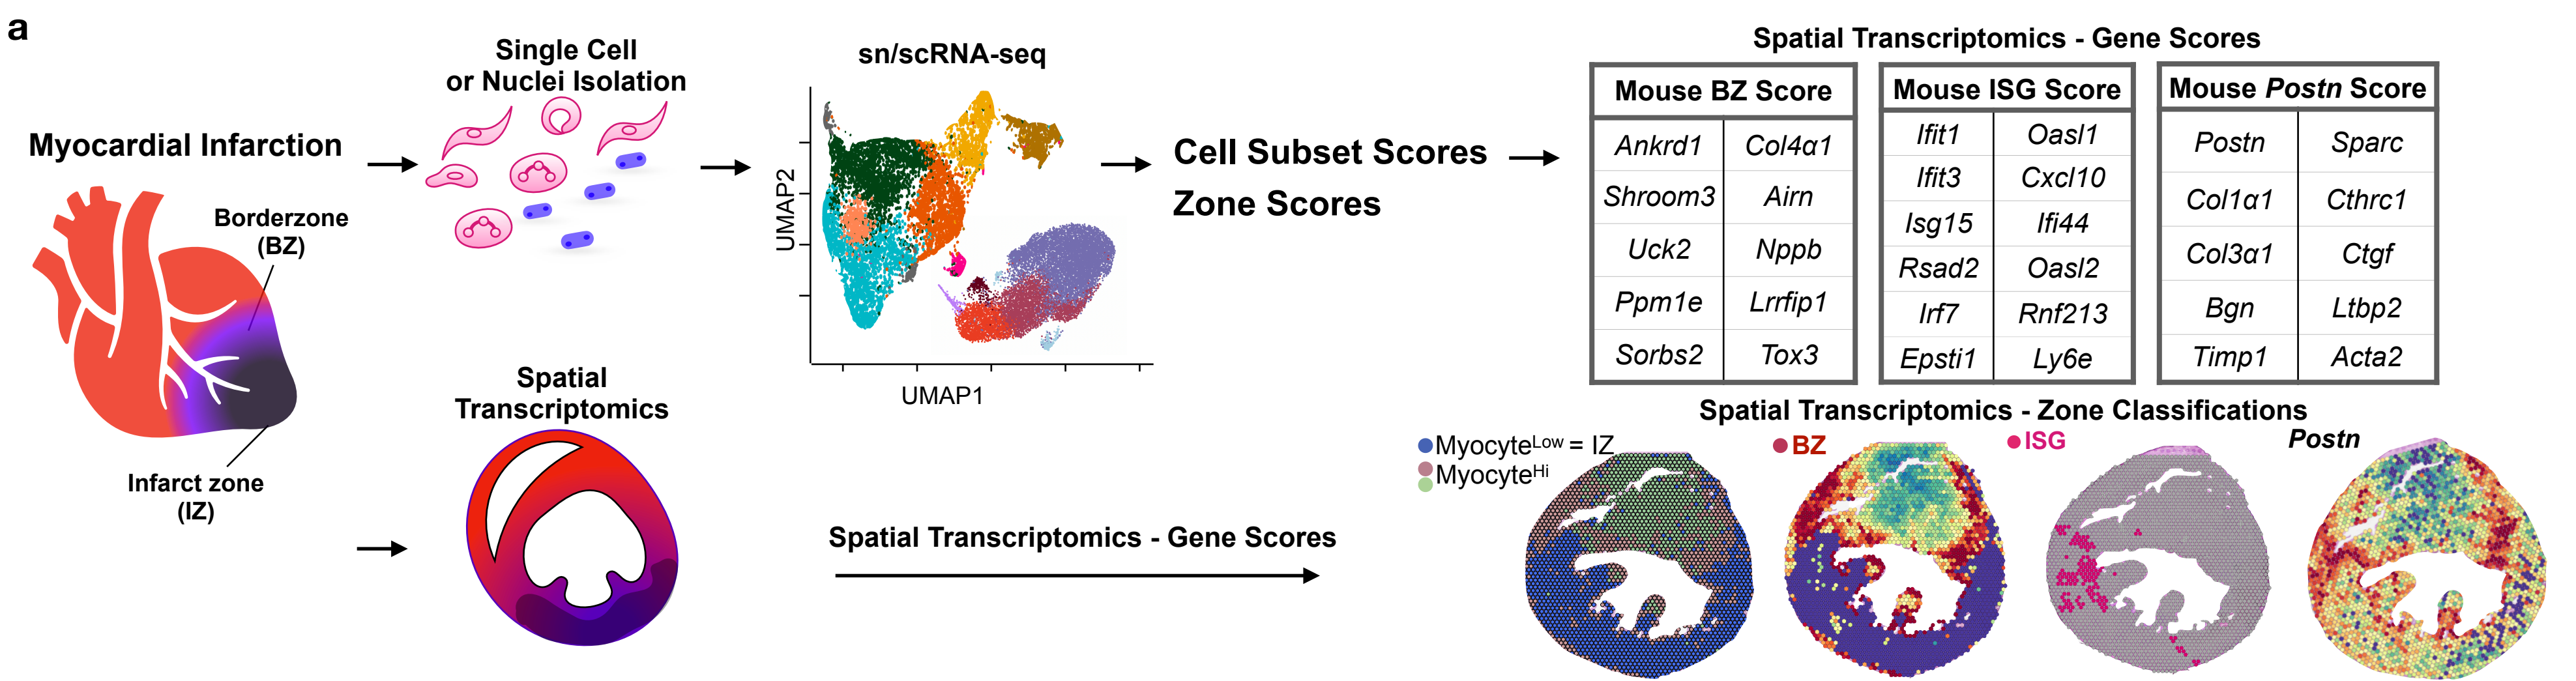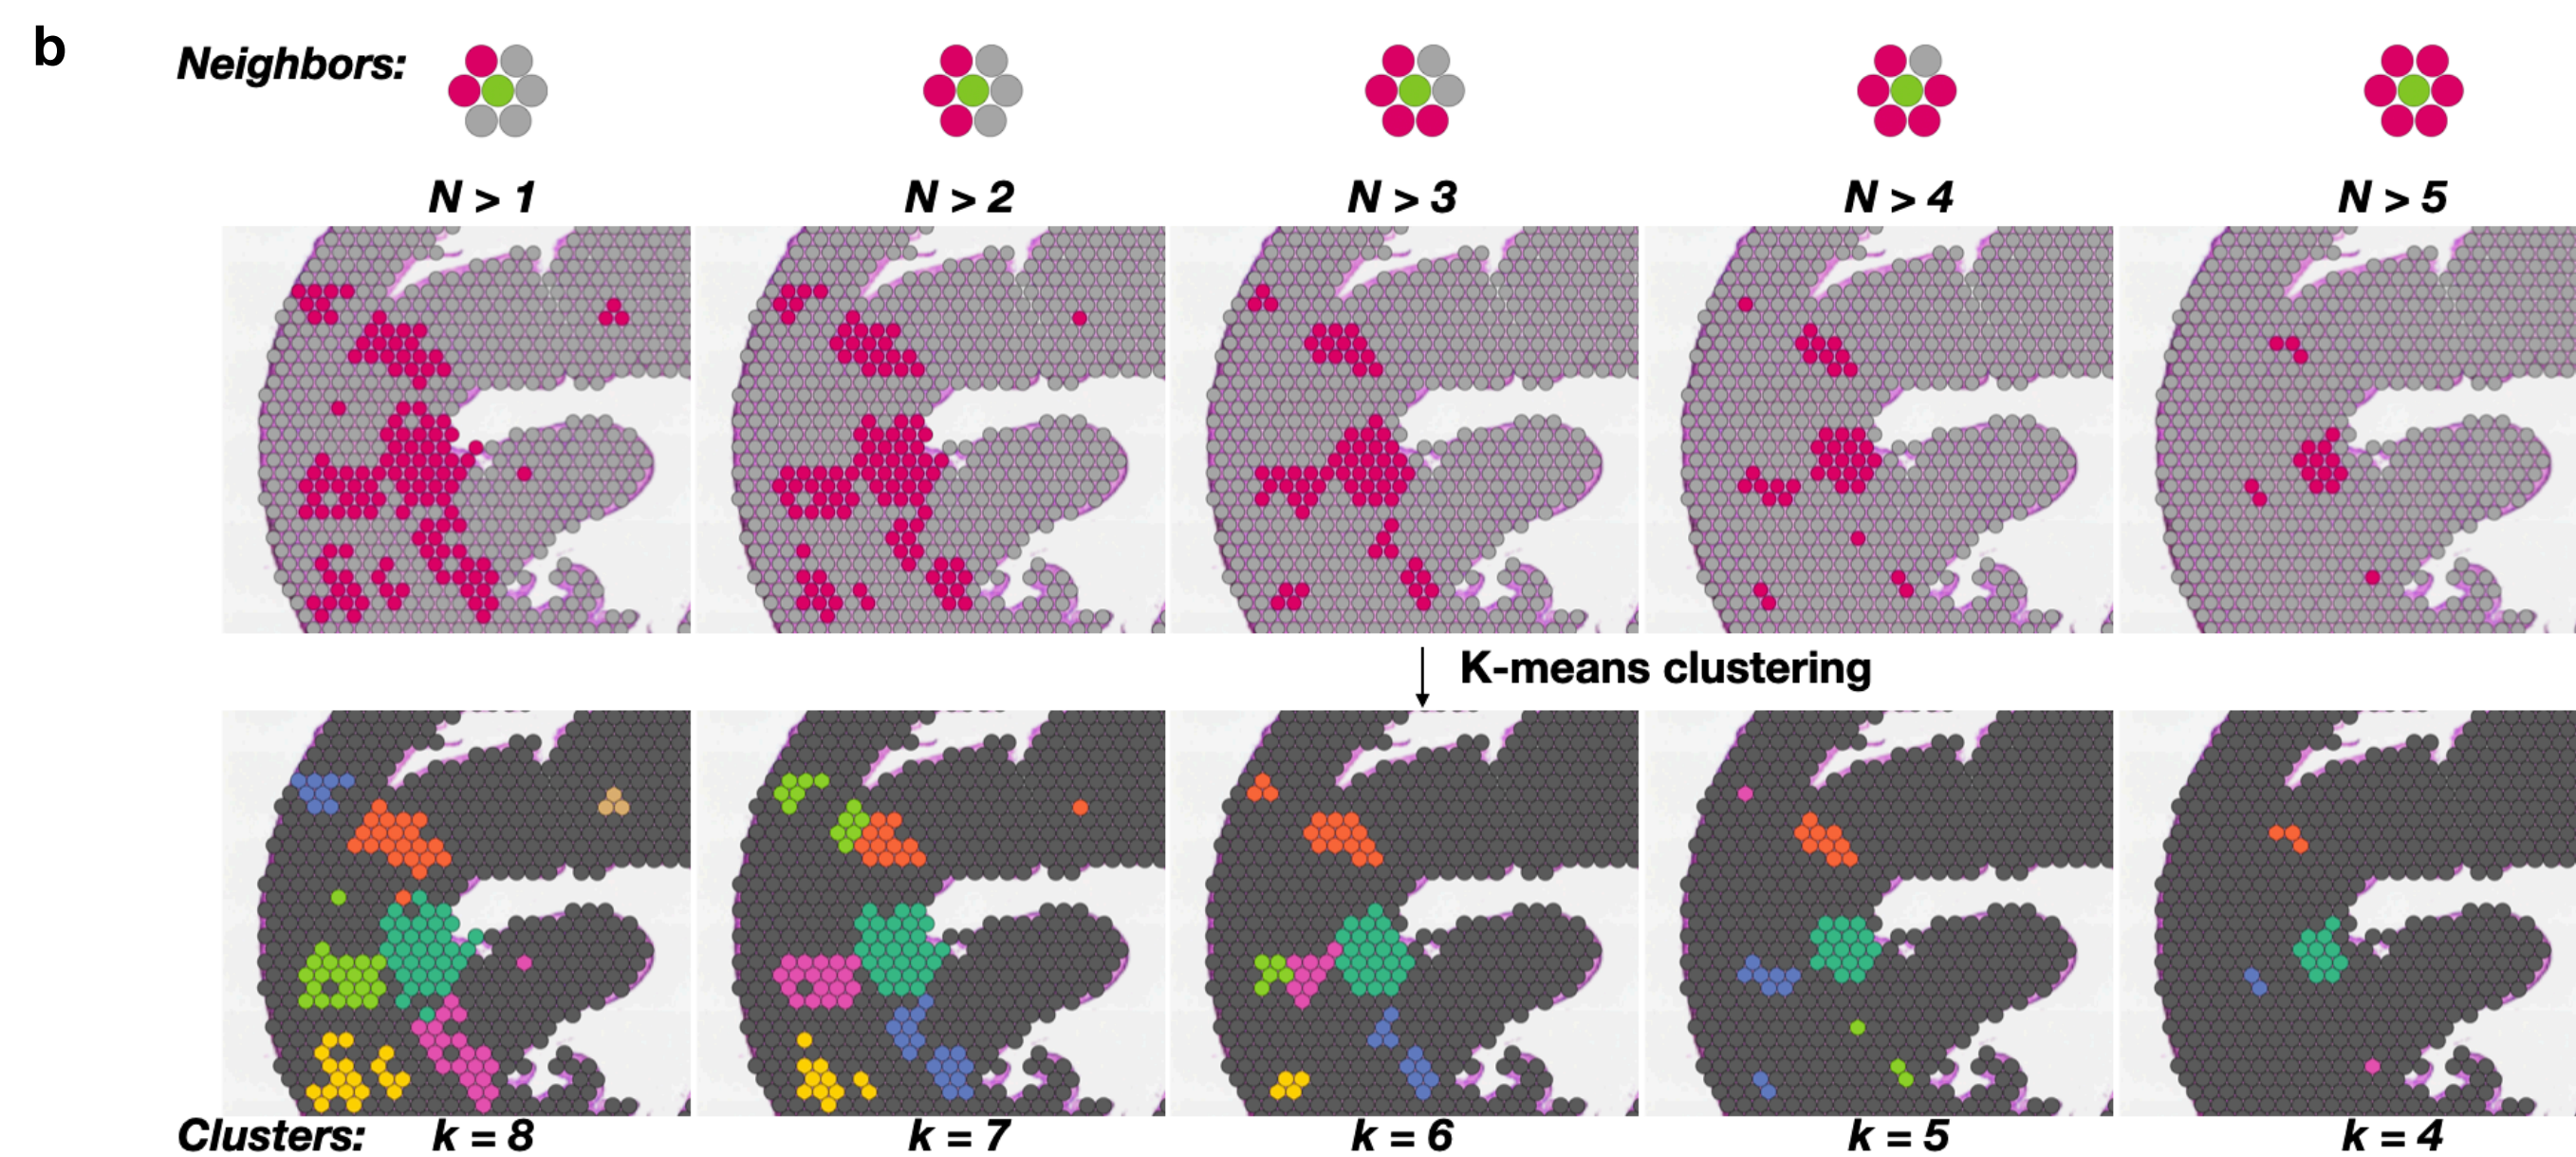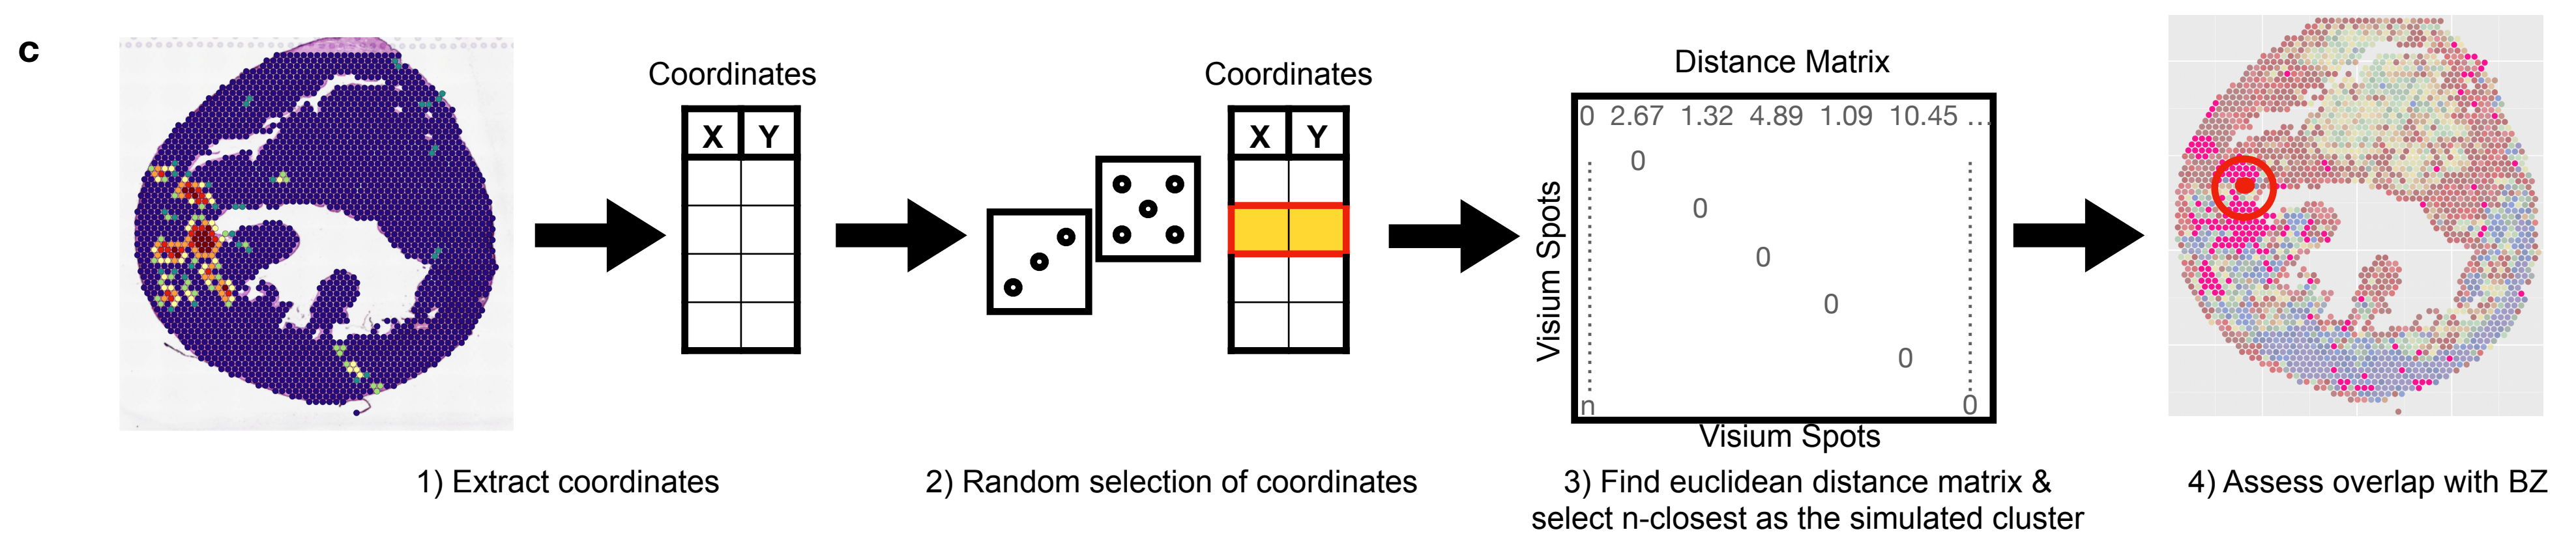

**Supplementary Fig 3 Gene scoring method from sc/snRNA-seq data to determine regional zones of the infarcted myocardium and methods for identifying IFNIC colonies.** (a) Experimental workflow. Gene scores are derived from differentially expressed genes (DEG) after clustering integrated sc/snRNA-seq data from previously developed scores for BZ and IZ. (b) K-means clustering of neighbors as a method of quantifying clustered gene expression. (c) Computation of IFNIC colony localization to the transcriptional BZ or IZ in integrated spatial dataset.



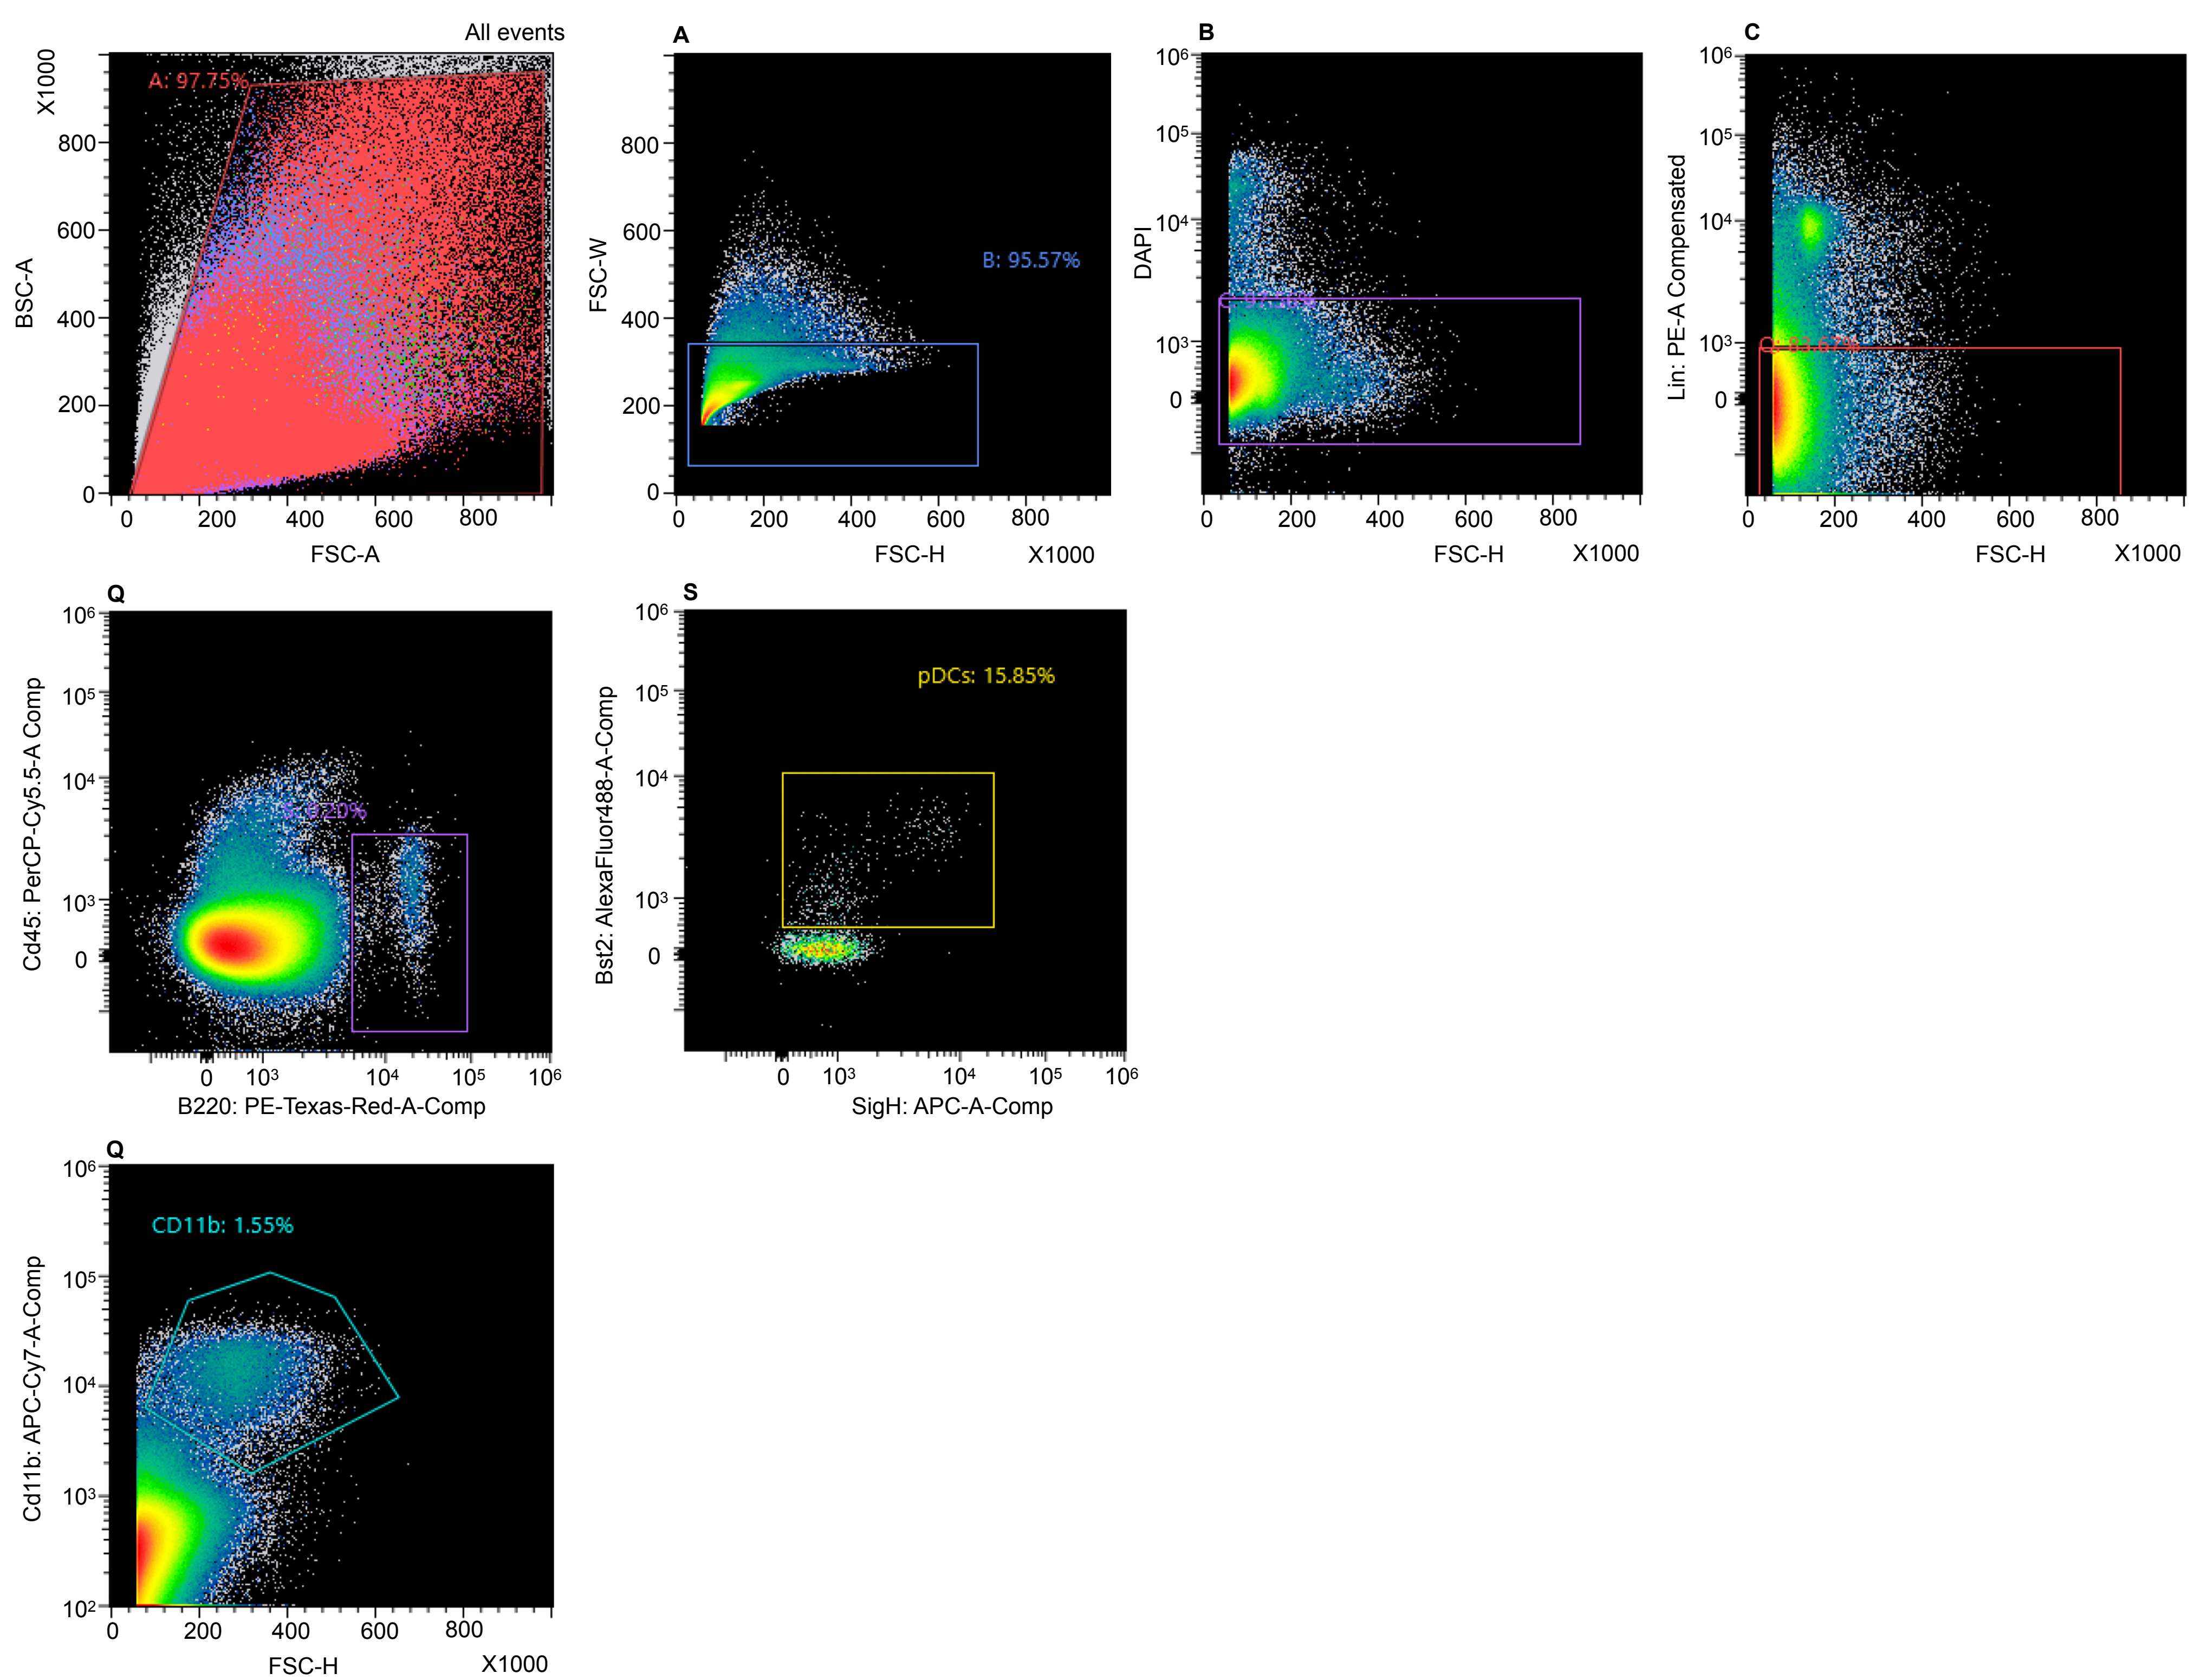

**Supplementary Fig. 4: Gating strategy for FACS of myeloid cells from plasmacytoid dendritic cell depletion.**

|                                     | IFNIC Source #1                                                     | IFNIC Source #2                                                      |
|-------------------------------------|---------------------------------------------------------------------|----------------------------------------------------------------------|
| Source                              | Extracardiac                                                        | Intracardiac                                                         |
| Location of origin                  | Bone marrow or other hematopoietic reservoir                        | Heart after injury (ischemia, mechanical trauma, etc)                |
| Initiator Cell Type                 | Hematopoietic Myeloid Progenitor                                    | Borderzone Cardiomyocyte                                             |
| Spatial Dynamics                    | Hematopoietic origin, hematogenous spread, and cardiac infiltration | Intracardiac BZ origin and local spread via diffusive cytokine (IFN) |
| IFNIC cell types (expressing ISGs)  | Neutrophils, monocytes, and monocyte derived macrophages            | Fibroblasts, macrophages, endothelial cells, neutrophils             |
| Location and distribution of IFNICs | Sparse throughout the IZ                                            | Localized to the BZ and adjacent edge of IZ                          |
| Colony Size                         | Mostly isolated cells (1-3 Visium spots)                            | Tightly packed clusters of cells (can be 12 spots and above)         |
| Irf3-dependent                      | Yes                                                                 | Yes                                                                  |
| Express Most ISGs                   | Yes                                                                 | Yes                                                                  |
| Publication                         | Calcagno, Taghdiri, et al<br>Science Immunology 2021                | Current Manuscript                                                   |

**Supplementary Fig. 5 The 2 IFNIC sources compared and contrasted.**
